# Supplementary material
Source: Springer Nature journal article supplement (https://www.springermedizin.de/resource/supplementary/12936_2013_3713_MOESM6_ESM.pdf/9545178)

## A. Kupffer cells

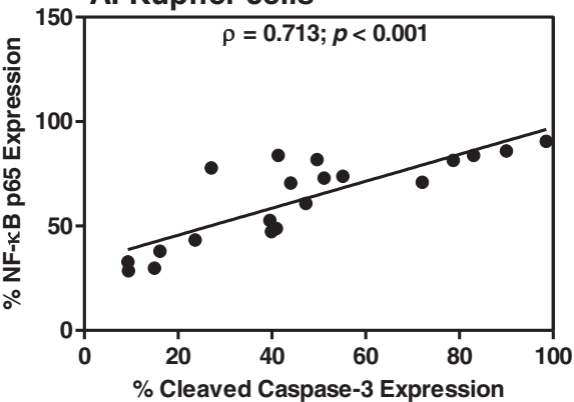

## B. Lymphocytes

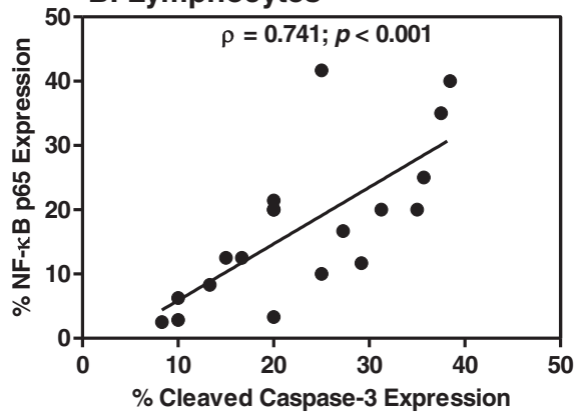

Supplement: MOESM6 [file 9545178]
